# Supplementary material for: Semiconductor-to-metal transition from monolayer to bilayer blue phosphorous induced by extremely strong interlayer coupling: a first-principles study
Source: Royal Society of Chemistry journal article supplement (doi:10.1039/d1nr08387b), 2022-01-01
Supplement: d1nr08387b1.pdf [file d1nr08387b1.pdf]

Supplementary Information for:

**Semiconductor-to-Metal Transition from Monolayer  
to Bilayer Blue Phosphorous Induced by Extremely  
Strong Interlayer Coupling: A First-principles Study**

Dan-Dong Wang,<sup>†</sup> Xin-Gao Gong,<sup>†‡</sup> Ji-Hui Yang<sup>†‡\*</sup>

<sup>†</sup>Key Laboratory of Computational Physical Sciences (Ministry of Education), Institute  
of Computational Physics, Fudan University, Shanghai 200433, China

<sup>‡</sup>Shanghai Qi Zhi Institute, Shanghai 200230, China

\*corresponding author

Email: [jhyang04@fudan.edu.cn](mailto:jhyang04@fudan.edu.cn)

**1. The Slater-Koster parameters for bilayer blue-P structure with A<sub>1</sub>B<sub>1</sub> stacking in the on-site and adjacent-sites unit cell.**

|                  | 1-s        | 1-p <sub>y</sub> | 1-p <sub>z</sub> | 1-p <sub>x</sub> | 2-s        | 2-p <sub>y</sub> |
|------------------|------------|------------------|------------------|------------------|------------|------------------|
| 1-s              | 5.5213245  | 0                | 0                | 0                | 1.4450006  | 0.9566837        |
| 1-p <sub>y</sub> | 0          | 71.042139        | 0                | 0                | -0.9566837 | 1.949396         |
| 1-p <sub>z</sub> | 0          | 0                | 16.296367        | 0                | 1.1466826  | 1.6121623        |
| 1-p <sub>x</sub> | 0          | 0                | 0                | 3.079527         | 1.6570244  | 2.3296701        |
| 2-s              | 1.4450006  | -0.9566837       | 1.1466826        | 1.6570244        | 5.5213245  | 0                |
| 2-p <sub>y</sub> | 0.9566837  | 1.949396         | 1.6121623        | 2.3296701        | 0          | 71.042139        |
| 2-p <sub>z</sub> | -1.1466826 | 1.6121623        | 1.3620916        | -2.7923464       | 0          | 0                |
| 2-p <sub>x</sub> | -1.6570244 | 2.3296701        | -2.7923464       | -0.7406743       | 0          | 0                |
| 3-s              | 0          | 0                | 0                | 0                | 0          | 0                |

**Table S1.** The Slater-Koster parameters in on-site unit cell (0,0,0). The ‘1-s’ means the s orbit of the 1<sup>st</sup> atom, and the other ones could be derived similarly. The unit is eV.

|                  | 1-s       | 1-p <sub>y</sub> | 1-p <sub>z</sub> | 1-p <sub>x</sub> | 2-s | 2-p <sub>y</sub> |
|------------------|-----------|------------------|------------------|------------------|-----|------------------|
| 1-s              | 0         | 0                | 0                | 0                | 0   | 0                |
| 1-p <sub>y</sub> | 0         | 0                | 0                | 0                | 0   | 0                |
| 1-p <sub>z</sub> | 0         | 0                | 0                | 0                | 0   | 0                |
| 1-p <sub>x</sub> | 0         | 0                | 0                | 0                | 0   | 0                |
| 2-s              | 1.445001  | 1.913367         | 1.146683         | -8.3E-07         | 0   | 0                |
| 2-p <sub>y</sub> | -1.913367 | -2.08571         | -3.224324        | 2.35E-06         | 0   | 0                |
| 2-p <sub>z</sub> | -1.146683 | -3.224324        | 1.362092         | 1.41E-06         | 0   | 0                |
| 2-p <sub>x</sub> | 8.3E-07   | 2.35E-06         | 1.41E-06         | 3.294432         | 0   | 0                |
| 3-s              | 1.445001  | 0.808444         | -1.536727        | 1.400265         | 0   | 0                |

**Table S2.** The Slater-Koster parameters in unit cell (0,1,0). The ‘1-s’ means the s orbit of the 1<sup>st</sup> atom, and the other ones could be derived similarly. The unit is eV.

|                  | 1-s | 1-p <sub>y</sub> | 1-p <sub>z</sub> | 1-p <sub>x</sub> | 2-s       | 2-p <sub>y</sub> |
|------------------|-----|------------------|------------------|------------------|-----------|------------------|
| 1-s              | 0   | 0                | 0                | 0                | 1.445001  | 0.956683         |
| 1-p <sub>y</sub> | 0   | 0                | 0                | 0                | -0.956683 | 1.949398         |
| 1-p <sub>z</sub> | 0   | 0                | 0                | 0                | 1.146682  | 1.612161         |
| 1-p <sub>x</sub> | 0   | 0                | 0                | 0                | -1.657025 | -2.32967         |
| 2-s              | 0   | 0                | 0                | 0                | 0         | 0                |
| 2-p <sub>y</sub> | 0   | 0                | 0                | 0                | 0         | 0                |
| 2-p <sub>z</sub> | 0   | 0                | 0                | 0                | 0         | 0                |
| 2-p <sub>x</sub> | 0   | 0                | 0                | 0                | 0         | 0                |
| 3-s              | 0   | 0                | 0                | 0                | 0         | 0                |

**Table S3.** The Slater-Koster parameters in unit cell (1,0,0). The ‘1-s’ means the s orbit of the 1<sup>st</sup> atom, and the other ones could be derived similarly. The unit is eV.

|                  | 1-s | 1-p <sub>y</sub> | 1-p <sub>z</sub> | 1-p <sub>x</sub> | 2-s | 2-p <sub>y</sub> |
|------------------|-----|------------------|------------------|------------------|-----|------------------|
| 1-s              | 0   | 0                | 0                | 0                | 0   | 0                |
| 1-p <sub>y</sub> | 0   | 0                | 0                | 0                | 0   | 0                |
| 1-p <sub>z</sub> | 0   | 0                | 0                | 0                | 0   | 0                |
| 1-p <sub>x</sub> | 0   | 0                | 0                | 0                | 0   | 0                |
| 2-s              | 0   | 0                | 0                | 0                | 0   | 0                |
| 2-p <sub>y</sub> | 0   | 0                | 0                | 0                | 0   | 0                |
| 2-p <sub>z</sub> | 0   | 0                | 0                | 0                | 0   | 0                |
| 2-p <sub>x</sub> | 0   | 0                | 0                | 0                | 0   | 0                |
| 3-s              | 0   | 0                | 0                | 0                | 0   | 0                |

**Table S4.** The Slater-Koster parameters in unit cell (1,1,0). The ‘1-s’ means the s orbit of the 1<sup>st</sup> atom, and the other ones could be derived similarly. The unit is eV.

|                  | 1-s | 1-p <sub>y</sub> | 1-p <sub>z</sub> | 1-p <sub>x</sub> | 2-s | 2-p <sub>y</sub> |
|------------------|-----|------------------|------------------|------------------|-----|------------------|
| 1-s              | 0   | 0                | 0                | 0                | 0   | 0                |
| 1-p <sub>y</sub> | 0   | 0                | 0                | 0                | 0   | 0                |
| 1-p <sub>z</sub> | 0   | 0                | 0                | 0                | 0   | 0                |
| 1-p <sub>x</sub> | 0   | 0                | 0                | 0                | 0   | 0                |
| 2-s              | 0   | 0                | 0                | 0                | 0   | 0                |
| 2-p <sub>y</sub> | 0   | 0                | 0                | 0                | 0   | 0                |
| 2-p <sub>z</sub> | 0   | 0                | 0                | 0                | 0   | 0                |
| 2-p <sub>x</sub> | 0   | 0                | 0                | 0                | 0   | 0                |
| 3-s              | 0   | 0                | 0                | 0                | 0   | 0                |

**Table S5.** The Slater-Koster parameters in unit cell (1, -1,0). The ‘1-s’ means the s orbit of the 1<sup>st</sup> atom, and the other ones could be derived similarly. The unit is eV.

## 2. The total energy in Blue-P with A<sub>1</sub>B<sub>-1</sub> stacking.

| Function      | PBE    | LDA    | PBE+SCAN+rVV10 | LDA+SCAN+rVV10 |
|---------------|--------|--------|----------------|----------------|
| Metal         | -5.472 | -6.193 | -10.288        | -45.099        |
| Semiconductor | -5.461 | --     | -10.300        | -45.074        |

**Table S6.** Calculated total energies of semiconducting and metallic phases of bilayer blue-P with A<sub>1</sub>B<sub>-1</sub> stacking based on different functionals. The unit is eV/atom. Note that, the semiconducting phase is not stable using the LDA functional.

### 3. Molecular dynamics simulations in Blue-P with $A_1B_{-1}$ stacking.

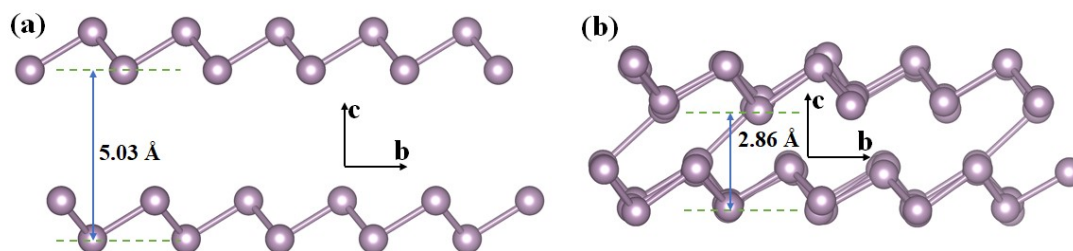

**Figure S1.** Structures of bilayer blue-P with  $A_1B_{-1}$  stacking before and after MD simulations at T=300 K. Note that, the semiconducting phase automatically transforms into the metallic phase after 5 ps. The MD simulations are performed using PBE+SCAN+rVV10 functionals. A 4x4 supercell is used and the lattice constants are allowed to relax.
